# Supplementary material for: Daytime isoprene nitrates under changing NO x and O 3
Source: Copernicus journal article supplement (doi:10.5194/acp-23-8473-2023), 2023-07-31
Supplement: Supplementary file 1 [file acp-23-8473-2023-supplement.pdf]

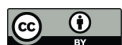

*Supplement of*

## **Daytime isoprene nitrates under changing $\text{NO}_x$ and $\text{O}_3$**

**Alfred W. Mayhew et al.**

*Correspondence to:* Jaqueline F. Hamilton ([jacqui.hamilton@york.ac.uk](mailto:jacqui.hamilton@york.ac.uk))

The copyright of individual parts of the supplement might differ from the article licence.

## Section S1 - Model Validation Plots

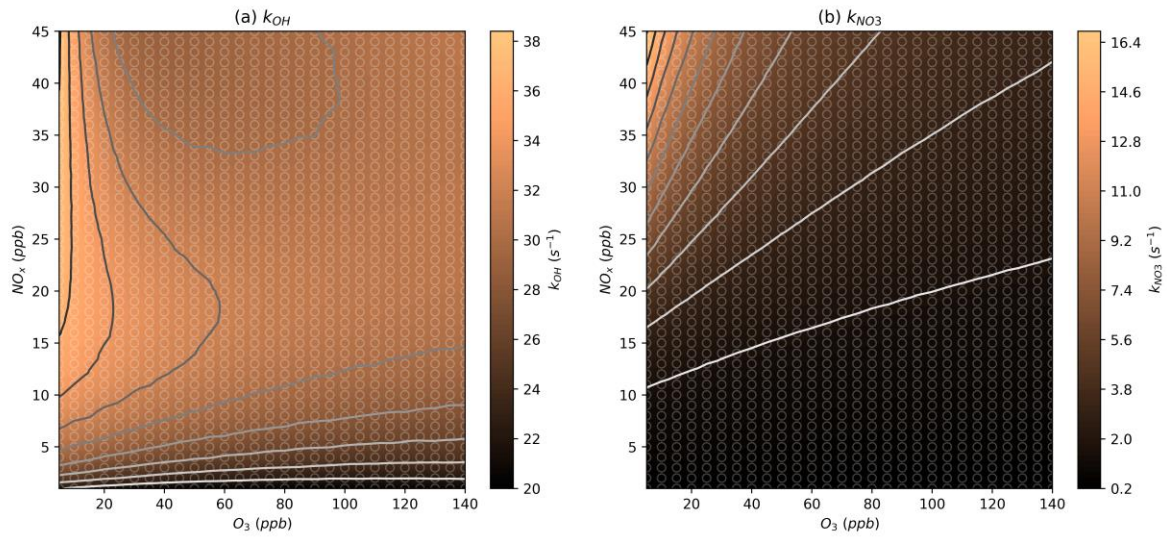

Figure S1. Modelled steady-state  $k_{OH}$  and  $k_{NO3}$  values at a wider range of  $NO_x$  and  $O_3$  mixing ratios.

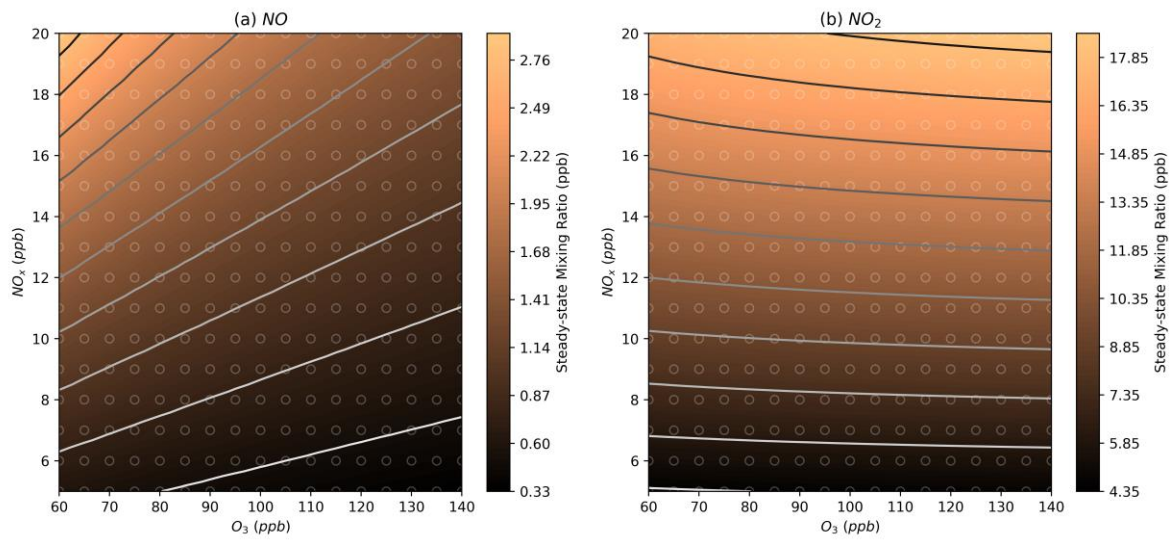

Figure S2. Modelled steady-state mixing ratios of NO and NO<sub>2</sub> at  $NO_x$  and  $O_3$  mixing ratios representative of those observed during the Beijing 2017 campaign.

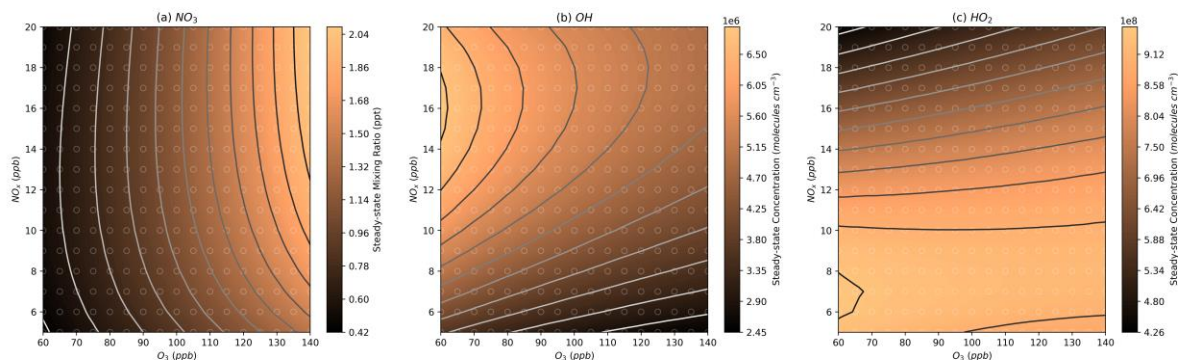

Figure S3. Modelled steady-state concentrations of  $\text{NO}_3$ ,  $\text{OH}$ , and  $\text{HO}_2$  at  $\text{NO}_x$  and  $\text{O}_3$  mixing ratios representative of those observed during the Beijing 2017 campaign.

## Section S2 - Sensitivity Tests

Figure S5 and Figure S6 show the isopleths for each organonitrate group investigated in this work under a lower isoprene mixing ratio of 0.5 ppb and a higher isoprene mixing ratio of 3 ppb. Increasing the isoprene mixing ratio has three effects: the absolute concentration of isoprene oxidation products increases for a given model run; the peak concentrations of IHN and other OH-initiated products occurs under higher  $\text{NO}_x$  conditions; the transition from  $\text{NO}_x$ -sensitive to  $\text{O}_3$ -sensitive regions in  $\text{NO}_3$ -initiated species occurs more gradually over a broader range of  $\text{NO}_x$  mixing ratios. These effects are explained later in this section. The shape of the isopleths, and hence the conclusions drawn regarding changes in  $\text{O}_3$  and  $\text{NO}_x$  concentrations, are consistent despite changing isoprene concentrations, and a discussion of the impact of changing isoprene concentrations on organonitrate concentrations will be included where necessary throughout the paper.

Methane was added to the model in order to account for additional reactivity which would be provided by other VOCs under ambient conditions. The mixing ratio of methane in the models was halved and doubled in two tests (41 ppm and 164 ppm respectively), and the results are shown in Figure S7 and Figure S8. The effect of increasing methane in the models on the shape of the concentration profiles is similar to the effect of increasing isoprene concentrations, though the absolute peak concentrations of the isoprene oxidation products does not change significantly. Higher methane concentrations result in the peak concentrations of OH-initiated products occurring at higher  $\text{NO}_x$  mixing ratios and also the broadening of the transition between  $\text{NO}_x$ -sensitive and  $\text{O}_3$ -sensitive regions in  $\text{NO}_3$ -initiated products.

For OH, the higher VOC concentrations mean that more  $\text{NO}_x$  is required to produce the same amount of OH at a given  $\text{O}_3$  to compensate for the increased conversion of OH to  $\text{HO}_2$  (Figure S4).

Similarly, for a given pair of  $\text{O}_3$  and  $\text{NO}_x$  concentrations, the  $\text{NO}_3$  concentrations will be higher at a higher  $\text{NO}_2/\text{NO}$  ratio due to higher formation from the  $\text{NO}_2+\text{O}_3$  reaction as well as lower loss from the  $\text{NO}_3+\text{NO}$  reaction. In these models, the  $\text{NO}_2/\text{NO}$  ratio is largely dictated by  $\text{HO}_2$  and  $\text{O}_3$  concentrations. Since  $\text{O}_3$  is held constant and  $\text{HO}_2$  concentrations are low at high  $\text{NO}_x$  concentrations (Figure 6c), the  $\text{NO}_2/\text{NO}$  ratio is constant for a given  $\text{O}_3$  concentration at high  $\text{NO}_x$  (Figure S9). There is an increase in  $\text{NO}_2$  at low- $\text{NO}_x$  where  $\text{HO}_2$  concentrations are important for converting NO to  $\text{NO}_2$ . The  $\text{NO}_3$  profile corresponds to this  $\text{NO}_2/\text{NO}$  ratio profile, with the added decrease in  $\text{NO}_3$  concentrations at low  $\text{NO}_x$  due to the availability of  $\text{NO}_2$  for  $\text{NO}_3$  formation (Figure 6a). Therefore, when  $\text{HO}_2$  concentrations increase due to higher VOC concentrations, the  $\text{NO}_2/\text{NO}$  ratio will increase allowing greater concentrations of  $\text{NO}_3$ .



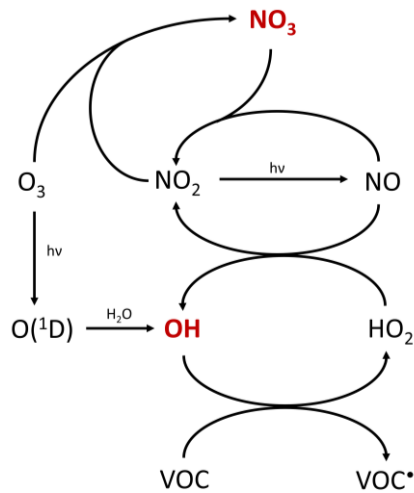

Figure S4. The chemical cycles controlling  $NO_3$  and  $OH$ . Some reaction pathways have been omitted for clarity.

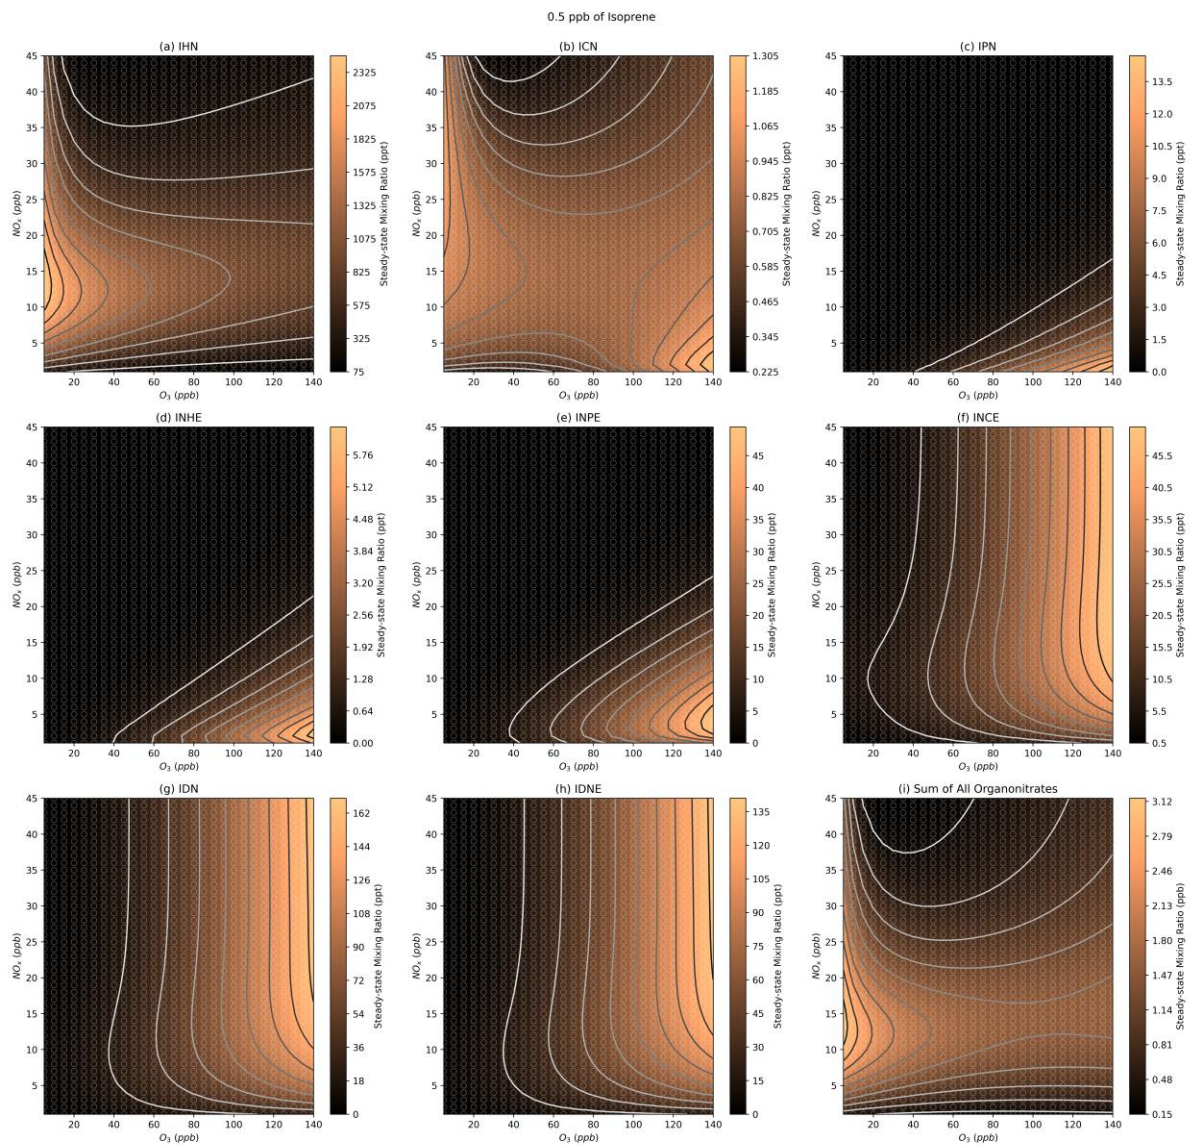

Figure S5. Modelled steady state organonitrate concentrations at the lower isoprene mixing ratio of 0.5 ppb.

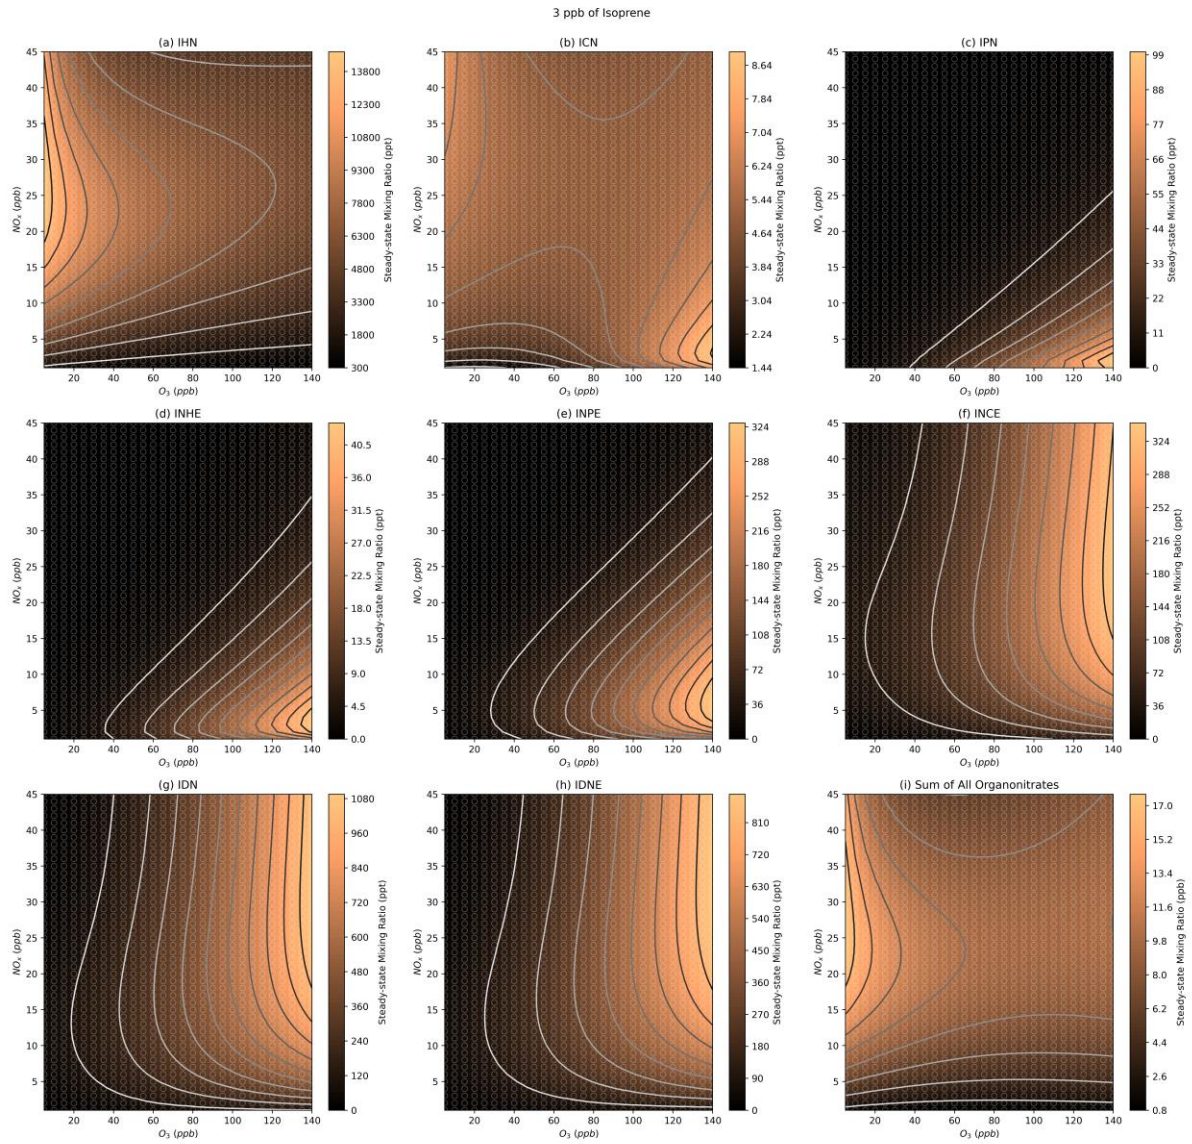

Figure S6. Modelled steady state organonitrate concentrations at the higher isoprene mixing ratio of 3 ppb.



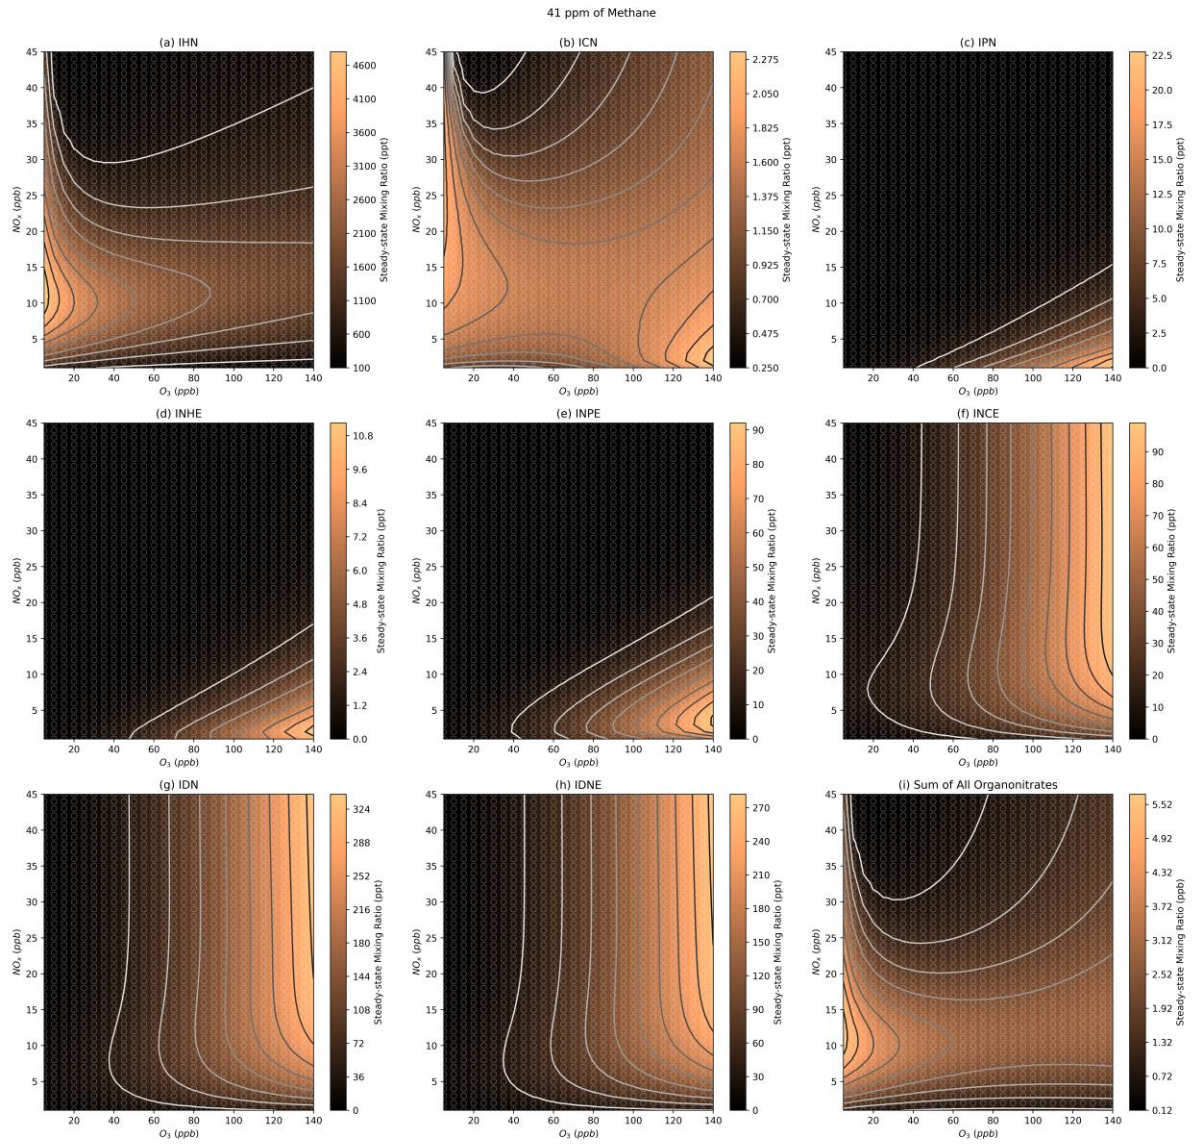

Figure S7. Modelled steady state organonitrate concentrations at the lower methane mixing ratio of 41 ppm.

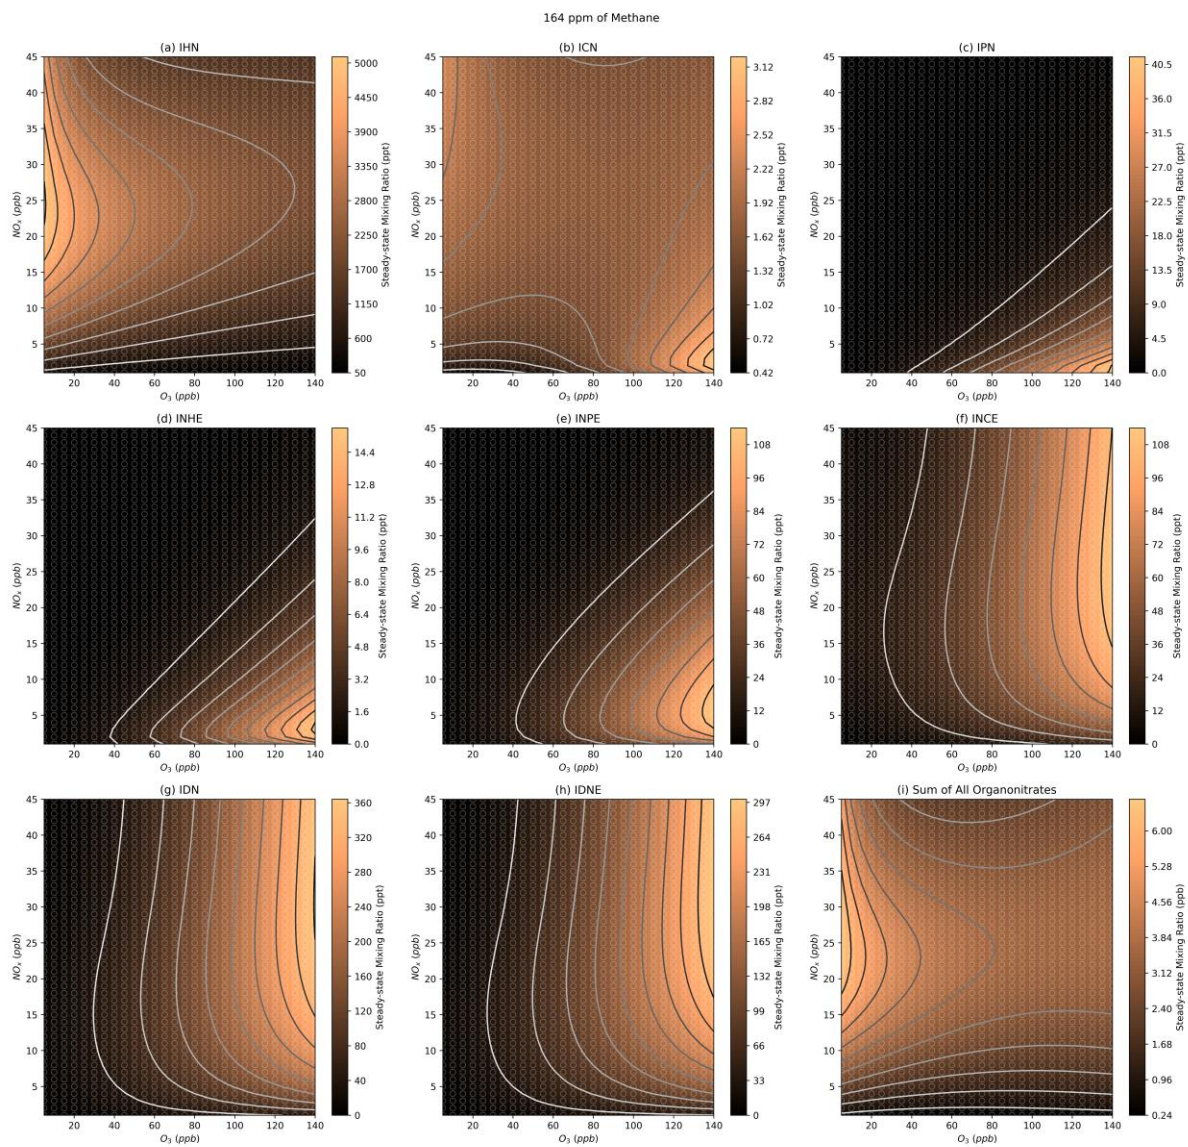

Figure S8. Modelled steady state organonitrate concentrations at the higher methane mixing ratio of 164 ppm.



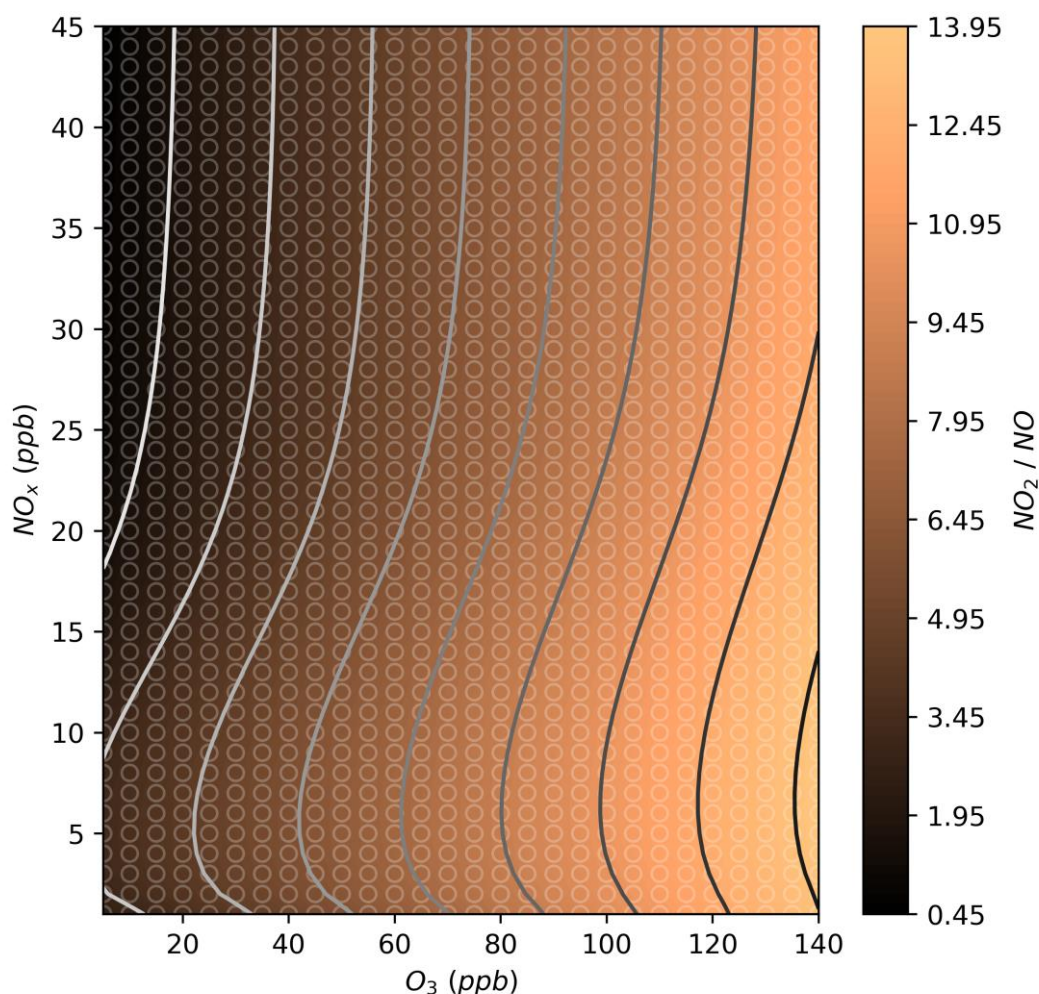

Figure S9. Modelled steady-state  $\text{NO}_2/\text{NO}$  ratios at a range of  $\text{NO}_x$  and  $\text{O}_3$  mixing ratios.

The dilution rate included in the models of  $2.31 \times 10^{-5} \text{ s}^{-1}$  was chosen to give a lifetime with respect to dilution of 12 hours. To test the sensitivity of the results to this decision, additional models were run with dilution lifetimes of 1 hour, 6 hours, and 24 hours. When halving the dilution rate such that the lifetime with respect to dilution is 24 hours (Figure S10), the absolute concentrations of the organonitrates increase due to the reduction in losses. However, the profile of the isopleths does not change. Similarly, doubling the dilution rate decreases species concentrations but does not alter the isopleth profiles (Figure S11). Increasing the dilution rate further, resulting in a dilution lifetime of 1 hour, does skew the isopleth profiles compared to the longer lifetime models, particularly impacting OH and OH-initiated products like IHN (Figure S12). Despite the difference made by this extreme change, many of the conclusions made in this work would hold true with regards to the  $\text{NO}_x\text{-O}_3$  regimes favoured by different organonitrate groups.



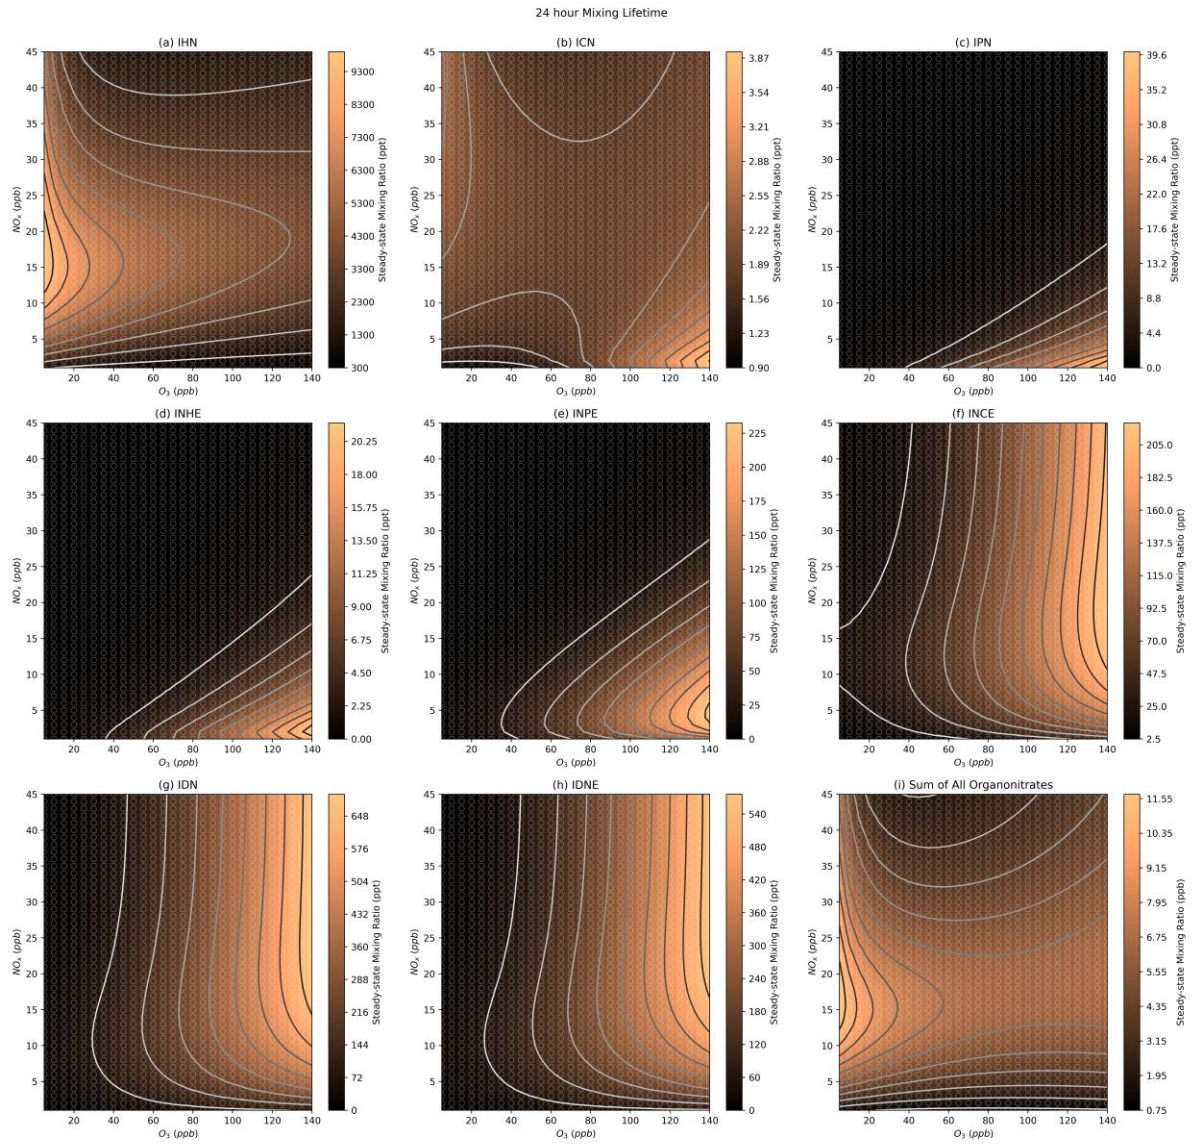

Figure S10. Modelled steady state organonitrate concentrations at the longer dilution lifetime of 24 hours.

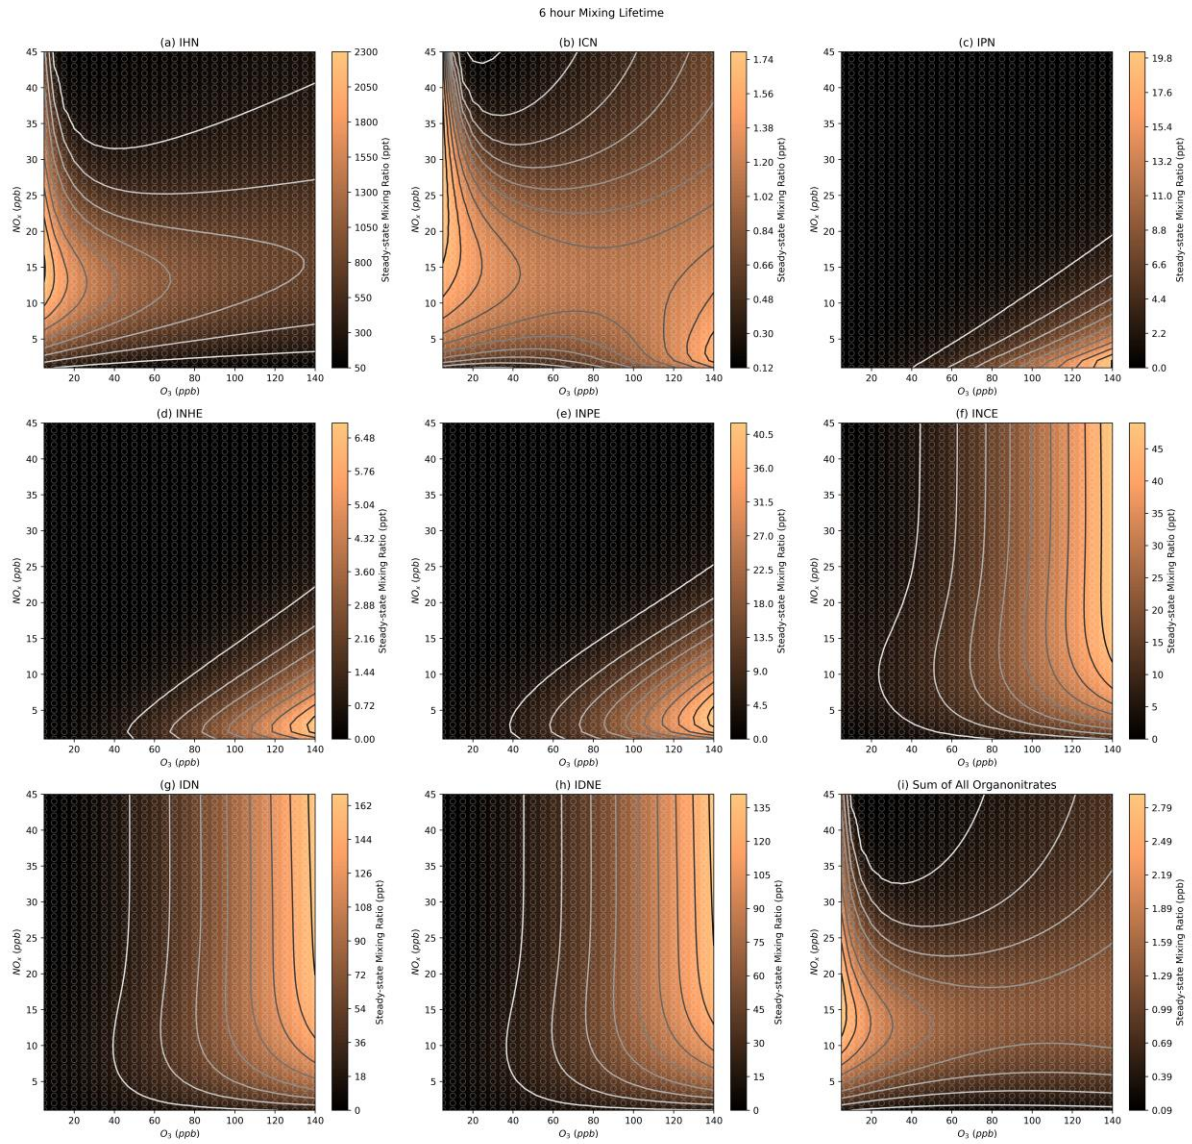

Figure S11. Modelled steady state organonitrate concentrations at the shorter dilution lifetime of 6 hours.



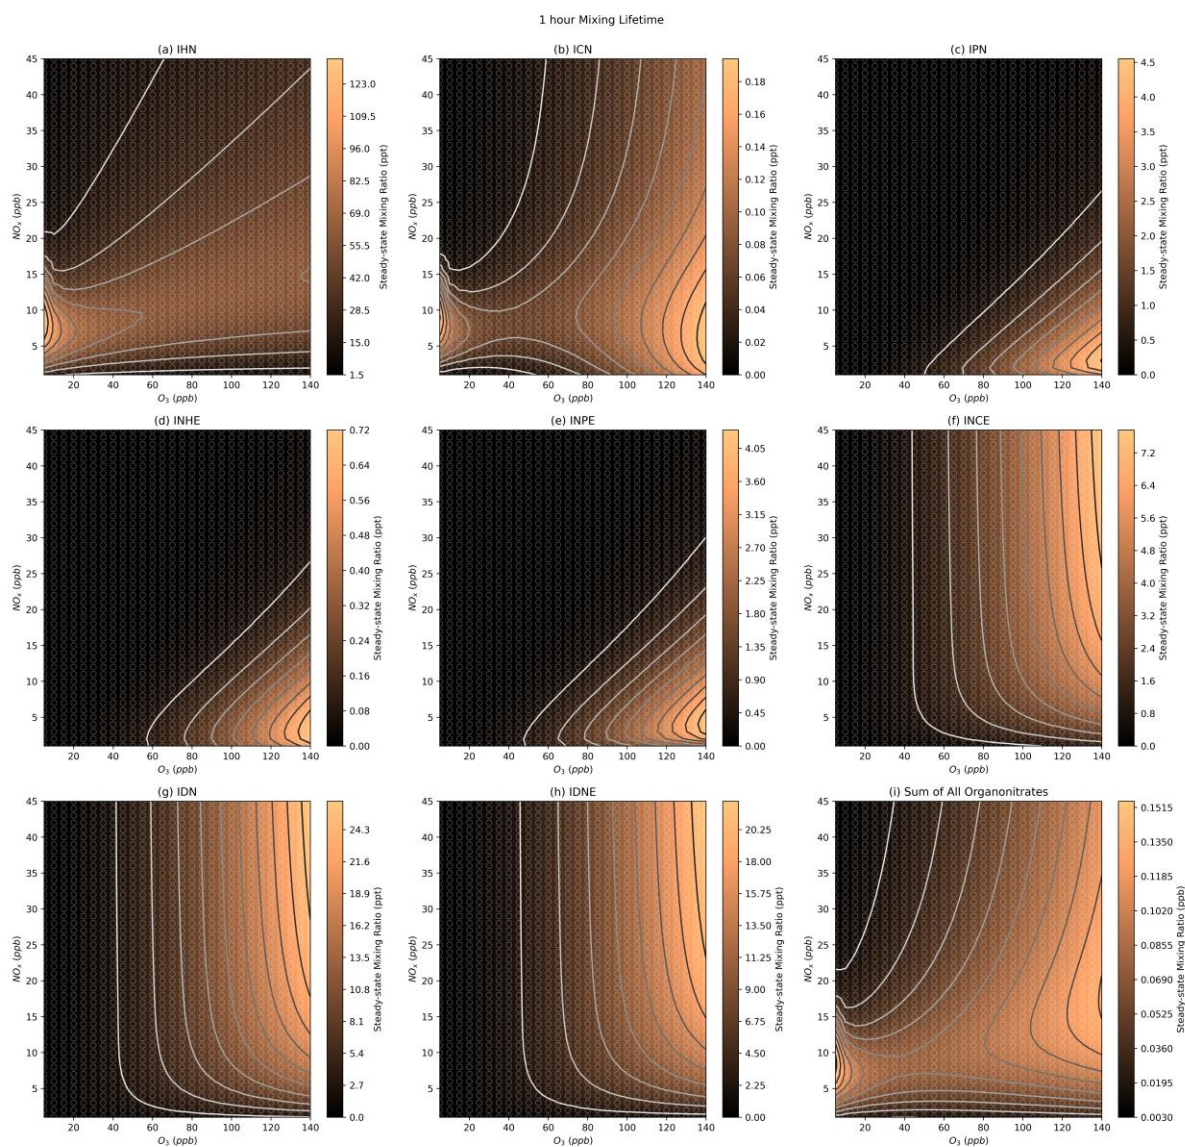

Figure S12. Modelled steady state organonitrate concentrations at the shorter dilution lifetime of 1 hour.

Although these models focus on the afternoon-period in Beijing, two separate sets of models were run under differing photolysis conditions corresponding to different times in the afternoon in Beijing, 2 hours before and after the chosen time of 16:00 local time (Figure S13 and Figure S14). The earlier time of 14:00 results in higher absolute concentrations of OH-initiated species such as IHN and slightly lower absolute concentrations of  $\text{NO}_3$  initiated species as a result of increased  $\text{NO}_3$  photolysis and higher NO concentrations. Despite the absolute differences in concentration, the profile of the  $\text{NO}_x$ - $\text{O}_3$  isopleth for each organonitrate group does not change significantly, though the impact of the  $\text{NO}_3$ -initiated organonitrates at high  $\text{O}_3$  mixing ratios in the total organonitrate isopleth is lessened. The later time of 18:00 is entering dusk in the summer of Beijing, so the role of  $\text{NO}_3$  chemistry is amplified and the OH chemistry is reduced. This is clear from the IHN profile which shows that the peak concentration occurs at high  $\text{O}_3$  and  $\text{NO}_x$ , since the  $\text{NO}_3$ -initiated pathway becomes the dominant formation route. This change means that the total organonitrate isopleth shape is very different in the 18:00 model, with the highest concentrations occurring under high- $\text{O}_3$ -high- $\text{NO}_x$  conditions, where  $\text{NO}_3$  is the highest. These time-of-day sensitivity tests illustrate that the conclusions made in this work are applicable during daytime photolysis conditions.

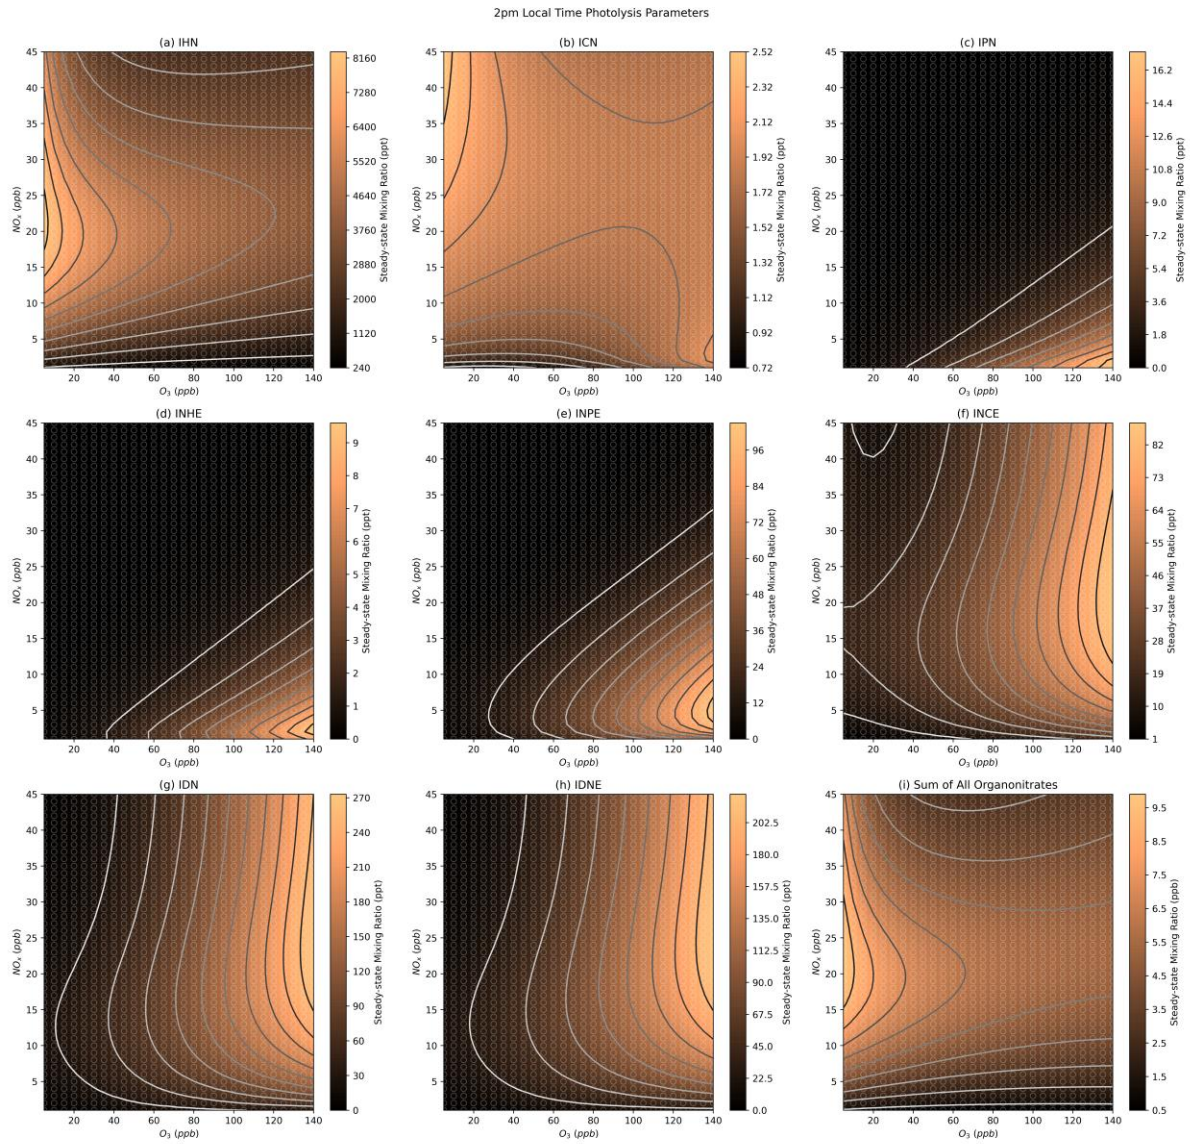

Figure S13. Modelled steady state organonitrate concentrations with photolysis conditions corresponding to the earlier model time of 14:00 local time.



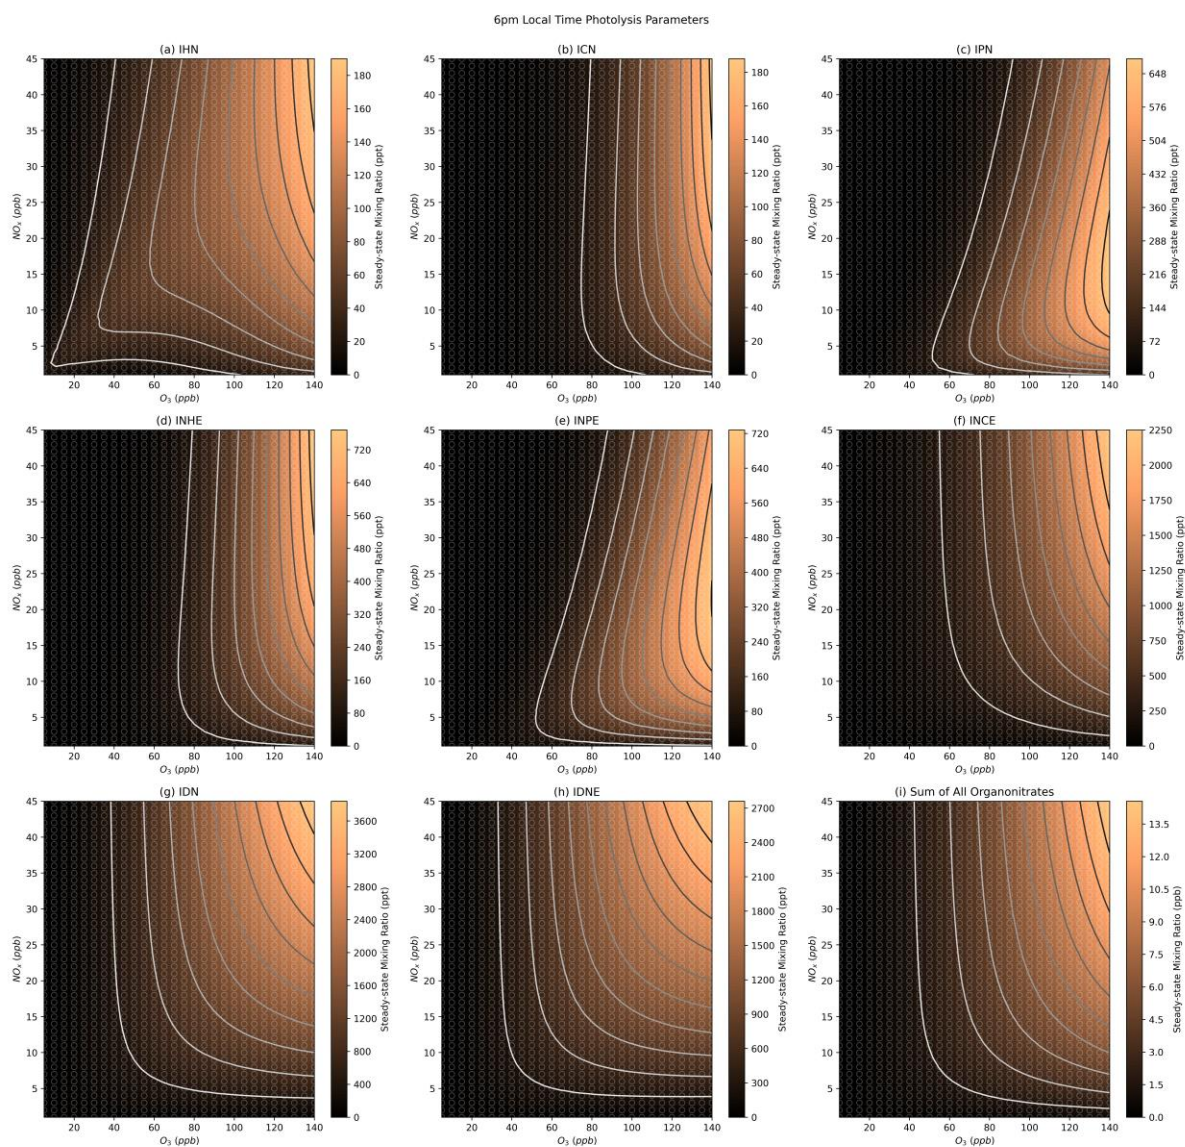

Figure S14. Modelled steady state organonitrate concentrations with photolysis conditions corresponding to the later model time of 18:00 local time.

## Section S3 - Saturation Concentration

As an alternative to the compound vapour pressures used in Section 4.6 of the main text, the saturation concentration (expressed as a log value,  $\log_{10}(C_{\text{Sat}})$ ) was estimated in order to assess the impact of changes in  $\text{NO}_x$  and  $\text{O}_3$  on SOA. The method for estimating  $\log_{10}(C_{\text{Sat}})$  is taken from Mohr *et al.* 2019, and uses Equation 1 to estimate  $\log_{10}(C_{\text{Sat}})$  based on the molecular formula of each compound.  $n_C$ ,  $n_N$ , and  $n_O$  are the number of carbon, nitrogen, and oxygen atoms respectively.  $b_C$ ,  $b_O$ ,  $b_{CO}$  and  $b_N$  are 0.475, 0.2, 0.9, 2.5 respectively. (Mohr *et al.*, 2019; Donahue *et al.*, 2011)

$$\log_{10}(S_{\text{sat}}) = (25 - n_C)b_C - (n_O - 3n_N)b_O - 2 \frac{(n_O - 3n_N) n_C}{n_C + n_O - 3n_N} b_{CO} - n_N b_N \quad \text{Equation 1}$$

This method does not account for the structure of each individual compound, hence the use of UManSysProp in the main text, but is presented here as an alternative method due to the different profile in Figure S15 compared to Figure 13. Figure S15 shows two peaks in normalised

concentration, one at low  $O_3$  and one at high  $O_3$ , in a similar fashion to the total organonitrate plot in Figure 12. However, due to the lower volatilities of the species formed under high  $O_3$ , the two normalised concentration peaks are of a similar magnitude in Figure S15. This means that, depending on the initial position in  $NO_x$ - $O_3$  space, reductions in either  $NO_x$  or  $O_3$  may result in increases in organonitrate SOA.

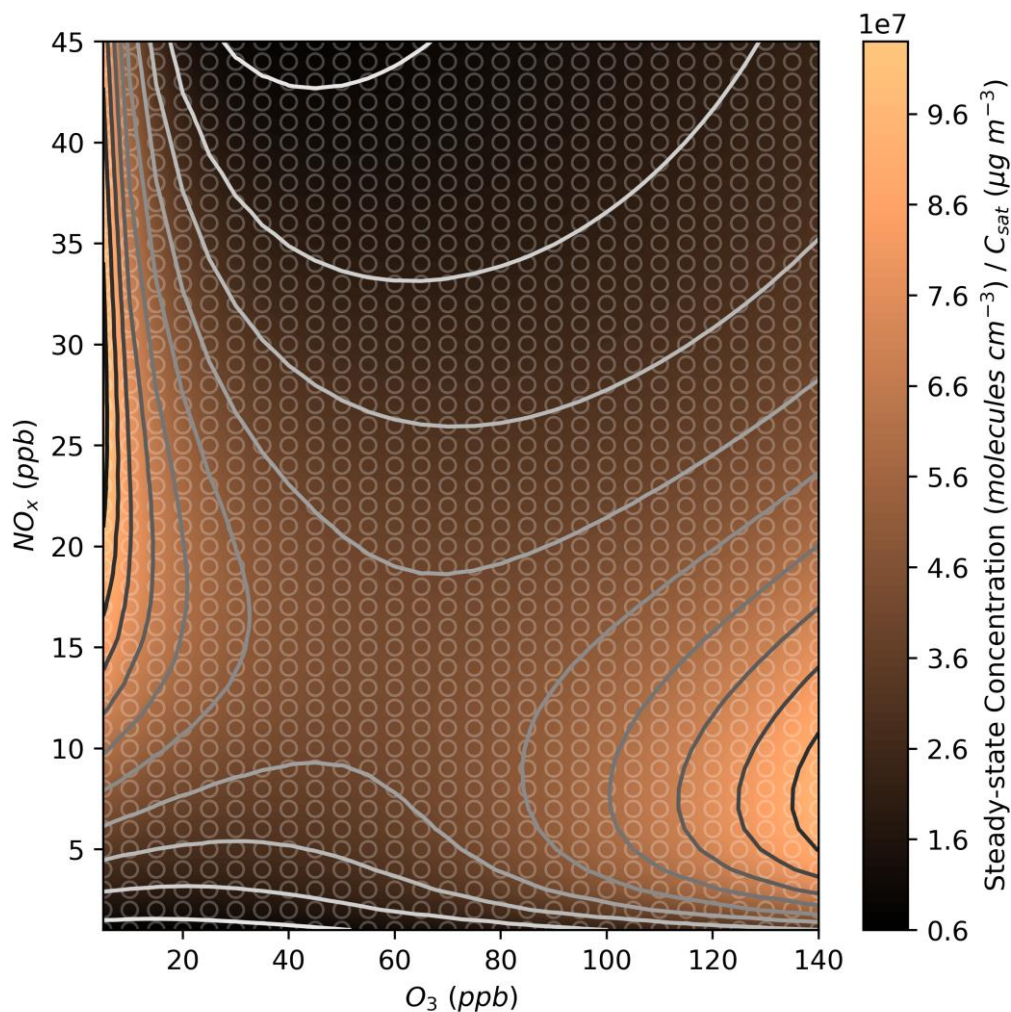

Figure S15. Modelled steady-state concentrations of the total organonitrates normalised to each compound's estimated saturation concentration at different  $NO_x$  and  $O_3$  mixing ratios.



## Section S4 - Additional Vapour Pressure Plots

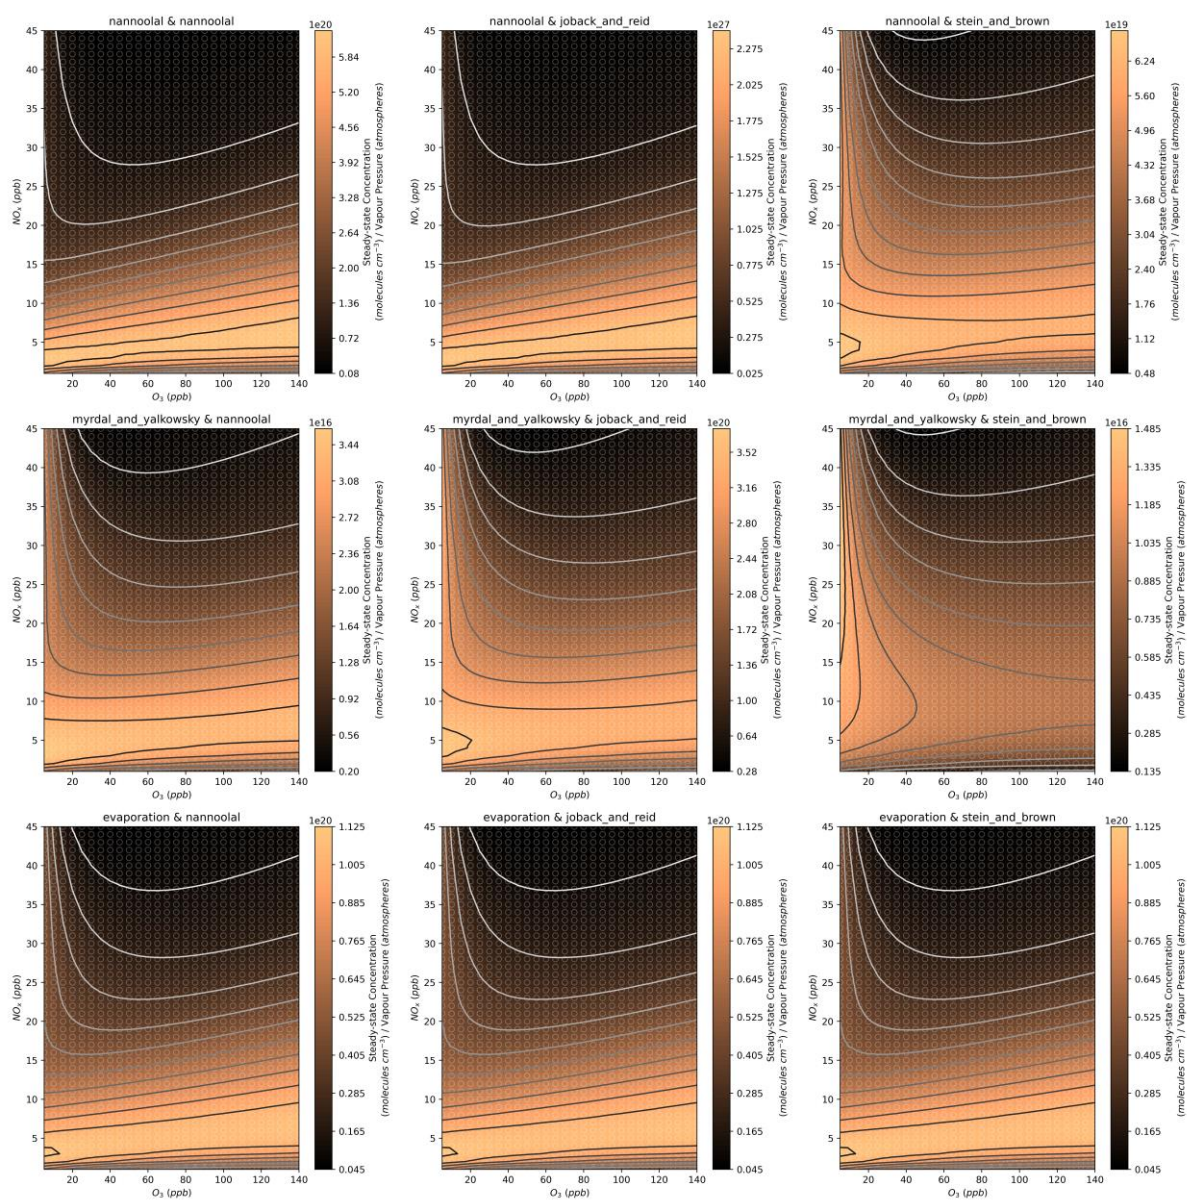

Figure S16. Modelled steady-state concentrations of the total organonitrates normalised to each compound's estimated vapour pressure at different  $\text{NO}_x$  and  $\text{O}_3$  mixing ratios using each combination of vapour pressure and boiling point methods available through the UManSysProp API.



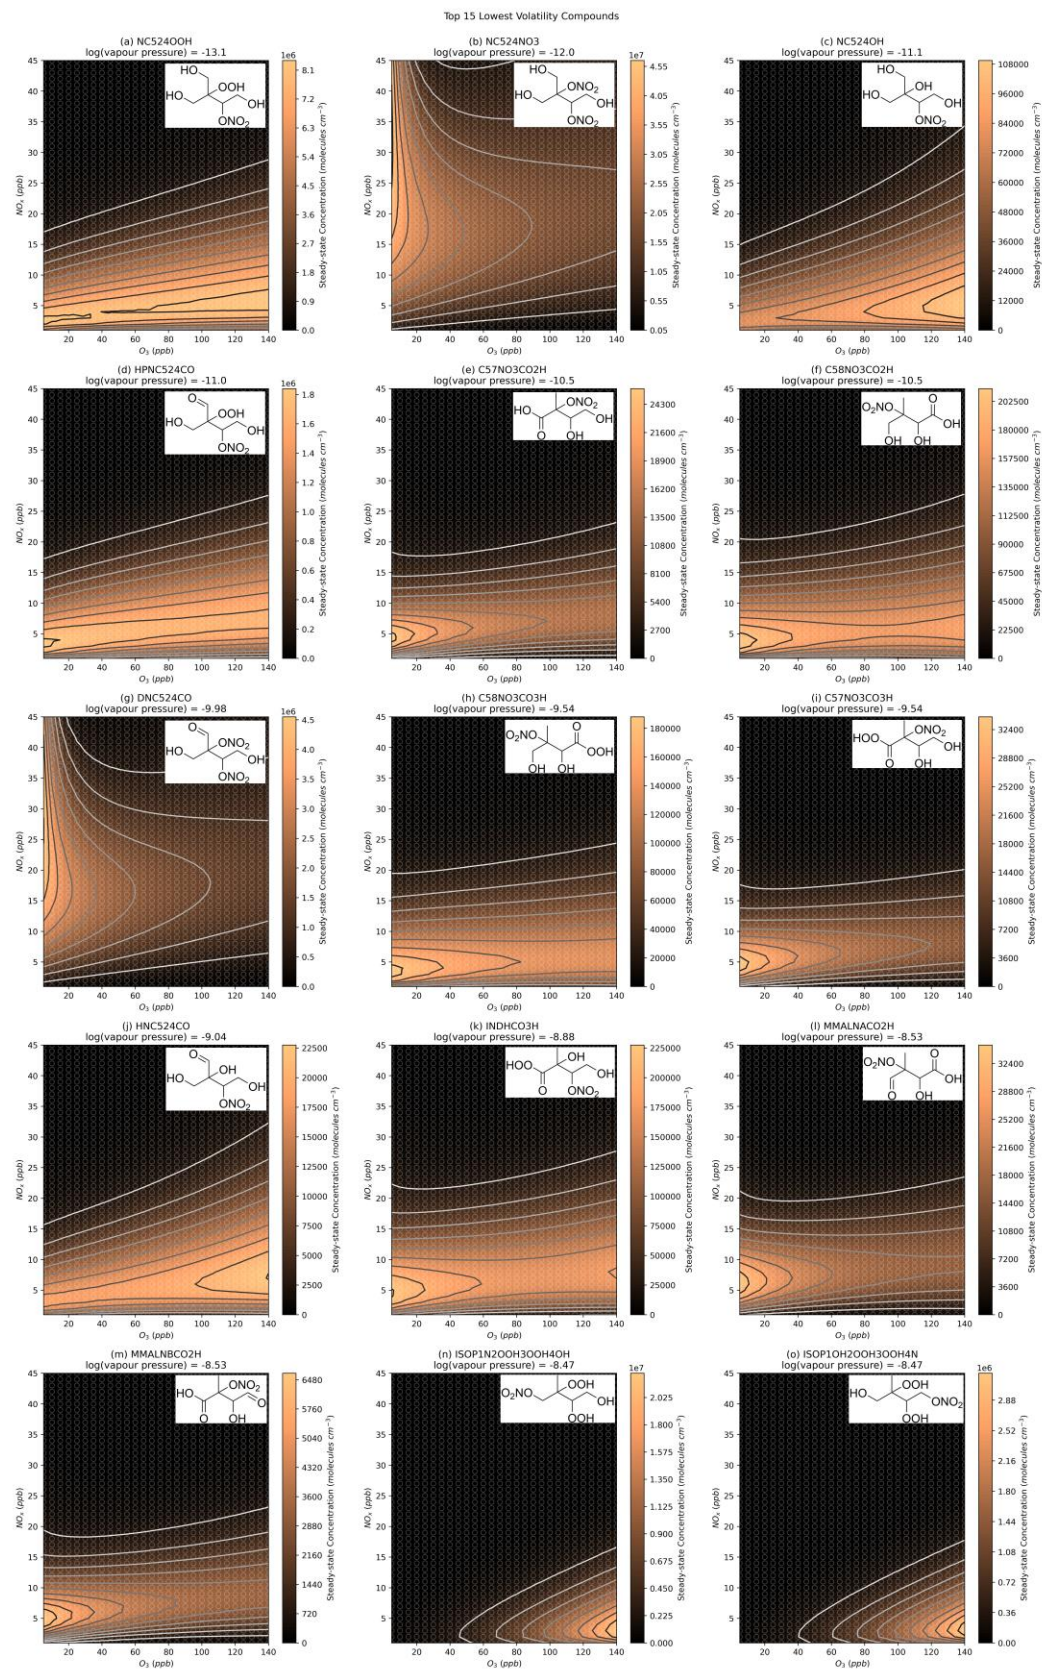

Figure S17. Modelled steady state concentrations of the 15 lowest volatility compounds at different  $\text{NO}_x$  and  $\text{O}_3$  mixing ratios.



## Section S5 - Amazon Models

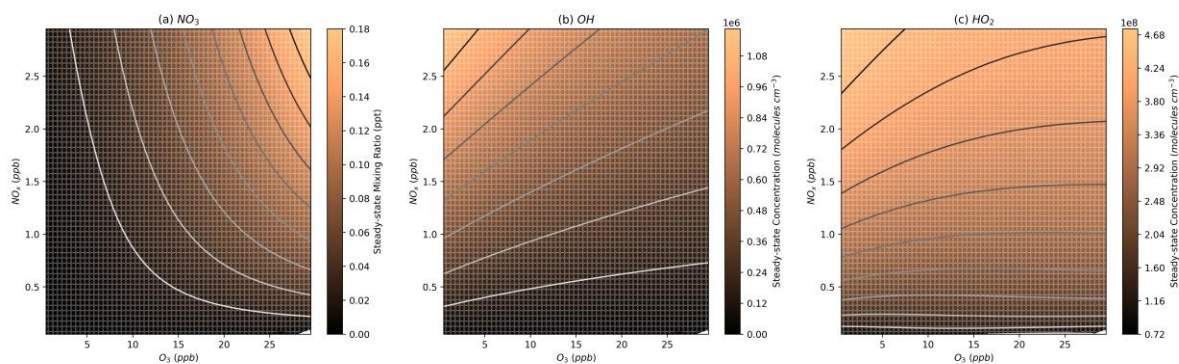

Figure S18. Modelled steady-state concentrations of  $\text{NO}_3$ ,  $\text{OH}$ , and  $\text{HO}_2$  in the Amazon models (lower  $\text{NO}_x$  and  $\text{O}_3$  concentrations and higher VOC concentrations than the Beijing models).

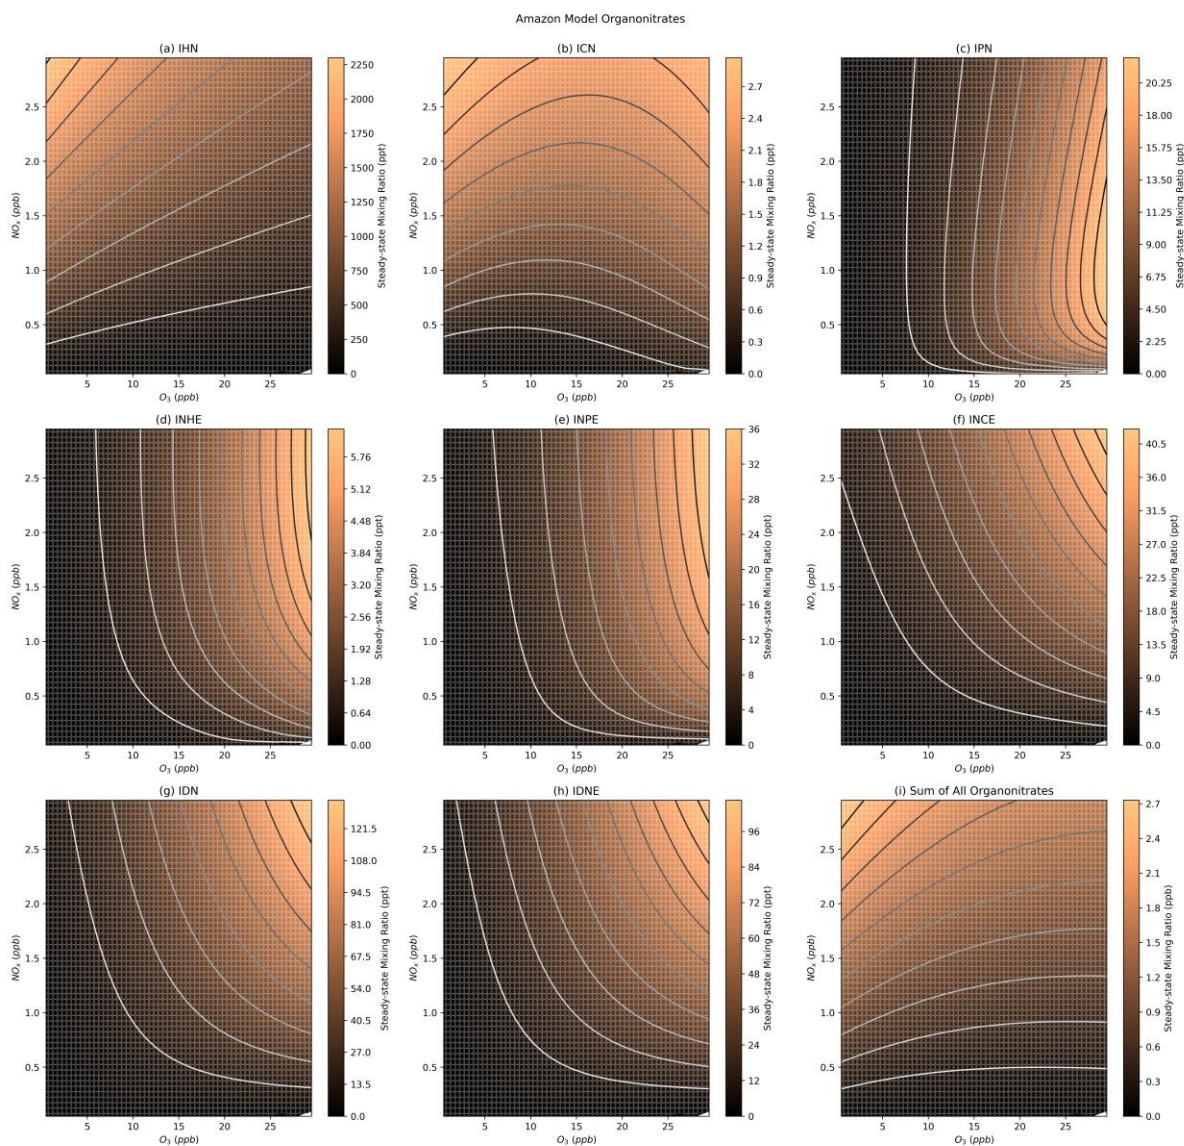

Figure S19. Modelled steady state organonitrate concentrations for the Amazon models (lower  $\text{NO}_x$  and  $\text{O}_3$  concentrations and higher VOC concentrations than the Beijing models).

## References

Donahue, N. M., Epstein, S. A., Pandis, S. N., and Robinson, A. L.: A two-dimensional volatility basis set: 1. organic-aerosol mixing thermodynamics, *Atmospheric Chemistry and Physics*, **11**, 3303-3318, 10.5194/acp-11-3303-2011, 2011.

Mohr, C., Thornton, J. A., Heitto, A., Lopez-Hilfiker, F. D., Lutz, A., Riipinen, I., Hong, J., Donahue, N. M., Hallquist, M., Petäjä, T., Kulmala, M., and Yli-Juuti, T.: Molecular identification of organic vapors driving atmospheric nanoparticle growth, *Nature Communications*, **10**, 10.1038/s41467-019-12473-2, 2019.
